# Supplementary material for: Risk of fracture in patients with hidradenitis suppurativa: A multi-center retrospective cohort study
Source: Research Square preprint supplement (doi:10.21203/rs.3.rs-7357330/v1), 2025-10-17
Supplement: Supplementary file 1 [file 7bfe64e79171d4e37e2f836d.docx]

**Supplementary Files**

**Table S1. Utilized proxy codes a**

| **Description** | **ICD-10-CM codes** |
| --- | --- |
| *Study population* |  |
| Hidradenitis suppurativa | ICD-10-CM: L73.2 |
| *Outcome: Fracture risk* |  |
| All fractures | ICD-10-CM: S02, S12, S22, S32, S42, S62, S72, S82, S92 |
| Vertebral fractures | ICD-10-CM: S12.0, S12.1, S12.2, S12.3, S12.4, S12.5, S12.6, S22.0, S32.0 |
| Hip fractures | ICD-10-CM: S72.0, S72.1, S72.2 |
| Wrist fractures | ICD-10-CM: S62.0, S62.1, S52.50, S52,51, S52.60, S52,61 |
| Proximal humeral fractures | ICD-10-CM: S42.2, S42.3 |
| Lower leg fractures | ICD-10-CM: S82.0, S82.1, S82.2, S82.3, S82.4, S82.5, S82.6, S82.8, S82.9 |
| *Other diseases or covariates* |  |
| Neoplasms | ICD-10-CM: C00-D49 |
| Diabetes mellitus | ICD-10-CM: E08-E13 |
| Hypertension | ICD-10-CM: I10 |
| Hyperlipidemia | ICD-10-CM: E78.5 |
| Vitamin D deficiency | ICD-10-CM: E55 |
| Menopausal and other perimenopausal disorders | ICD-10-CM: N95 |
| Persons with potential health hazards related to socioeconomic and psychosocial circumstances | ICD-10-CM: Z55-Z65 |
| Mental and behavioral disorders due to psychoactive substance use | ICD-10-CM: F10-F19 |
| Alopecia areata | ICD-10-CM: L63.9 |
| Contact Dermatitis | ICD-10-CM: L23.9 |
| Psoriasis | ICD-10-CM: L40 |
| Atopic dermatitis | ICD-10-CM: L20.9 |
| *Medications* | **RxNorm/VA codes** |
| Corticosteroids for systemic use | ATC code: H02 |
| Non-steroidal anti-inflammatory drugs | VA: CN104 |
| Estrogens | ATC code: G03C |
| Hormonal contraceptives for systemic use | ATC code: G03A |

aICD-10-CM: International Classification of Diseases, Tenth Revision, Clinical Modification;

**Table S2. Description of all applied sensitivity analysis models**

| **Models** | **Description** | **Corresponding table** |
| --- | --- | --- |
| **Applying different definitions of hidradenitis suppurativa (HS)** | | |
| Algorithm 1 | Only patients diagnosed HS and was never diagnosed of cutaneous abscess by specialists at the same time were included as HS group in this model. The algorithm has been validated in a previous validation study with the PPV of 88%. | **Figure 4** |
| Algorithm 2 | Only patients diagnosed HS and with the record of being prescribed of systemic corticosteroids or non-steroidal anti-inflammatory drugs were included as HS group in this model. |
| Algorithm 3 | Only patients diagnosed HS and with the record of underwent drainage and incision were included as HS group in this model. |
| Algorithm 4 | Only patients diagnosed HS and with a record of use of antibiotics with anti-inflammatory properties were included as HS group in this model. |
| **Applying different follow-up time after index date** | | |
| 5 years /10 years /15 years after index date | Only the outcome event occurs within the set follow-up time will be counted. In all sub-analyses, the wash-out period was set as 3 months. | **Figure 4** |
| **Applying different wash-out period after index date** | | |
| 12 months/24 months/36 months after index date | Outcome event occurs within the set wash-out period will be excluded from further analysis. In all sub-analyses, the follow-up period was set as 15 years. | **Figure 4** |
| **Applying different matching covariates** | | |
| Crude model | Analysis did not undergo propensity score matching. | **Figure 4** |
| Matching model 1 | Matching covariates include age at index, sex, race, BMI, medical utilization status (inpatient encounter, ambulatory). |
| Matching model 2 | Matching covariates include age at index, sex, race, BMI, medical utilization status (inpatient encounter, ambulatory), comorbidity status (including diabetes mellitus, hypertension, hyperlipidemia, vitamin D deficiency, menopausal and other perimenopausal disorders). |
| **Applying different active comparators** | | |
| Comparing with psoriasis patients/ comparing with comparing with alopecia areata patients | The control cohort in each sub-analysis will consist of the respective inflammatory skin diseases (psoriasis, alopecia areata) that has been reported to be associated with autoimmune disorders. In all sub-analyses, the follow-up period was set as 15 years and the wash-out period was set as 3 months. | **Figure 4** |
| **Applying different models considering the influence of osteoporosis** | | |
| Not excluding osteoporosis patients from study population/  excluding osteoporosis patients before index date | In these two analyses, osteoporosis patients were either excluded or not excluded before the index date. The analyses were performed to evaluate whether osteoporosis influences the observed HS-fracture association, given its significant impact on new-onset fractures. | **Tables S3-S4** |

**Table S3.** Sensitivity analysis: not excluding osteoporosis patients from study population

| **Outcome: New-onset fracture** | Study cohort with incident outcome event, n (%) | | Hazard ratio (95% CI) |
| --- | --- | --- | --- |
| Case patients | Control patients |
| **Primary Analyses** |  |  |  |
| All fractures | 3,685(6.8) | 3,045(5.7) | **1.27 (1.21,1.33)** |
| **Subtypes of fractures** |  |  |  |
| Vertebral fractures | 340(0.6) | 245(0.5) | **1.44 (1.22,1.69)** |
| Hip fractures | 93(0.2) | 86(0.2) | 1.12 (0.84,1.51) |
| Wrist fractures | 313(0.6) | 302(0.6) | 1.07 (0.92,1.26) |
| Proximal humeral fractures | 188(0.4) | 148(0.3) | **1.31 (1.06,1.63)** |
| Lower leg fractures | 790(1.5) | 645(1.2) | **1.27 (1.14,1.41)** |

**Table S4.** Sensitivity analysis: excluding osteoporosis patients before index date

| **Outcome: New-onset fracture** | Study cohort with incident outcome event, n (%) | | Hazard ratio (95% CI) |
| --- | --- | --- | --- |
| Case patients | Control patients |
| **Primary Analyses** |  |  |  |
| All fractures | 3,429(6.7) | 2,814(5.5) | **1.27(1.21,1.33)** |
| **Subtypes of fractures** |  |  |  |
| Vertebral fractures | 302(0.6) | 239(0.5) | **1.30 (1.10,1.54)** |
| Hip fractures | 88(0.2) | 94(0.2) | 0.96 (0.72,1.29) |
| Wrist fractures | 278(0.1) | 273(0.1) | 1.05 (0.89,1.24) |
| Proximal humeral fractures | 165(0.3) | 118(0.2) | **1.44 (1.13,1.82)** |
| Lower leg fractures | 733(1.4) | 599(1.2) | **1.26 (1.13,1.40)** |
